# Supplementary material for: Parkinson’s Disease Non-Motor Subtypes Classification in a Group of Slovenian Patients: Actuarial vs. Data-Driven Approach
Source: MDPI journal article supplement (doi:10.3390/jcm12237434), 2023-11-30
Supplement: s1 [file s1]

# Supplementary material

Table S1. Demographic and clinical characteristics of the overall study population based on a priori NMSS subtyping

|                                                                                              | Overall<br>(n= 168)<br>(100%) | Cortical<br>(n= 38)<br>(22.6%) | Limbic<br>(n=48)<br>(28.6%) | Brainstem<br>(n=82)<br>(48.8%) | P-value              | Adj. P-value<br>(Benjamini-<br>Hochberg) | Post hoc<br>test<br>(significant<br>pairs)                        |
|----------------------------------------------------------------------------------------------|-------------------------------|--------------------------------|-----------------------------|--------------------------------|----------------------|------------------------------------------|-------------------------------------------------------------------|
| <b>Gender</b><br><b>(male)</b>                                                               | 100<br>(59.9%)                | 24<br>(63.2%)                  | 20<br>(41.7%)               | 56 (68.3%)                     | 0.010 $\chi^2$       | 0.020                                    | Limbic-M/F                                                        |
| <b>Age (years)</b>                                                                           | 71.70 $\pm$<br>9.57           | 77.08 $\pm$<br>8.42            | 68.81 $\pm$<br>8.88         | 70.89 $\pm$<br>9.57            | <0.001 <sup>KW</sup> | 0.055 (sig.)                             | Cortical-<br>Limbic<br>Cortical-<br>Brainstem                     |
| <b>Age at onset</b><br><b>(years)</b>                                                        | 65.45 $\pm$<br>10.18          | 72.21 $\pm$<br>8.06            | 61.90 $\pm$<br>9.55         | 64.40 $\pm$<br>10.06           | <0.001 <sup>KW</sup> | 0.014                                    | Cortical-<br>Limbic<br>Cortical-<br>Brainstem                     |
| <b>Age at onset</b><br><b>50-70 years</b><br><b>(%)</b>                                      | 103<br>(61.3%)                | 12<br>(31.6%)                  | 33<br>(68.8%)               | 58 (70.7%)                     | <0.001 <sup>KW</sup> | 0.014                                    | Cortical-<br>Limbic<br>Cortical-<br>Brainstem                     |
| <b>Education <math>\geq</math></b><br><b>3. stage</b><br><b>based on</b><br><b>ISCED (%)</b> | 123<br>(73.2%)                | 18<br>(47.3%)                  | 39<br>(81.2%)               | 66 (80.4%)                     | <0.001 <sup>KW</sup> | 0.028                                    | Cortical-<br>Limbic<br>Cortical-<br>Brainstem                     |
| <b>Right-</b><br><b>handed (%)</b>                                                           | 144<br>(85.7%)                | 23<br>(60.5%)                  | 45<br>(93.8%)               | 76 (92.7%)                     | 0.001 $\chi^2$       | 0.018                                    | Cortical-<br>Left/Right                                           |
| <b>Disease</b><br><b>duration &gt; 10</b><br><b>years (%)</b>                                | 34<br>(20.2%)                 | 3 (7.9%)                       | 12<br>(25.0%)               | 19 (23.2%)                     | 0.045 <sup>KW</sup>  | 0.077                                    | Cortical-<br>Limbic                                               |
| <b>+ family</b><br><b>history</b>                                                            | 27<br>(16.1%)                 | 11<br>(28.9%)                  | 6<br>(12.5%)                | 10 (12.2%)                     | 0.235 $\chi^2$       | 0.294                                    |                                                                   |
| <b>Side of onset</b><br><b>- right (%)</b>                                                   | 92<br>(54.8%)                 | 25<br>(65.8%)                  | 23<br>(47.9%)               | 44 (53.7%)                     | 0.245 $\chi^2$       | 0.299                                    |                                                                   |
| <b>Motor subtype:</b>                                                                        |                               |                                |                             |                                |                      |                                          |                                                                   |
| <b>TD (%)</b>                                                                                | 87<br>(51.8%)                 | 2 (5.3%)                       | 36<br>(75.0%)               | 49 (59.8%)                     | <0.001 $\chi^2$      | 0.004                                    | Cortical-<br>TD/PIGD,<br>Limbic-<br>TD/PIGD<br>Brainstem-<br>PIGD |
| <b>PIGD (%)</b>                                                                              | 61<br>(36.3%)                 | 33<br>(86.8%)                  | 7<br>(14.6%)                | 21 (25.6%)                     |                      |                                          |                                                                   |
| <b>Intermediate</b><br><b>(%)</b>                                                            | 20<br>(11.9%)                 | 3 (7.9%)                       | 5<br>(10.4%)                | 12 (14.6%)                     |                      |                                          |                                                                   |
| <b>Risk factors</b>                                                                          |                               |                                |                             |                                |                      |                                          |                                                                   |
| <b>Pesticides</b><br><b>(%)</b>                                                              | 53<br>(31.5%)                 | 11<br>(28.9%)                  | 11<br>(22.9%)               | 31 (37.8%)                     | 0.196 $\chi^2$       | 0.251                                    |                                                                   |
| <b>Solvents (%)</b>                                                                          | 28<br>(16.7%)                 | 5<br>(13.2%)                   | 7<br>(14.6%)                | 16 (19.5%)                     | 0.617 $\chi^2$       | 0.640                                    |                                                                   |
| <b>Rural</b><br><b>environment</b><br><b>(%)</b>                                             | 111<br>(66.1%)                | 20<br>(52.6%)                  | 31<br>(64.6%)               | 60 (73.2%)                     | 0.084 $\chi^2$       | 0.136                                    |                                                                   |
| <b>Head injury</b><br><b>(%)</b>                                                             | 26<br>(15.5%)                 | 10<br>(26.3%)                  | 6<br>(12.5%)                | 10 (12.2%)                     | 0.110 $\chi^2$       | 0.168                                    |                                                                   |

|                                    |                     |                     |                     |                     |                 |       |                                        |
|------------------------------------|---------------------|---------------------|---------------------|---------------------|-----------------|-------|----------------------------------------|
| <b>Non-caffeine (%)</b>            | 56<br>(33.3%)       | 16<br>(42.1%)       | 7<br>(14.6%)        | 33 (40.2%)          | 0.005 $\chi^2$  | 0.012 | Limbic-Y/N                             |
| <b>Alcohol (%)</b>                 | 53<br>(31.5%)       | 6<br>(15.8%)        | 10<br>(20.8%)       | 37 (45.1%)          | 0.002 $KW$      | 0.006 | Cortical-Brainstem<br>Limbic-Brainstem |
| <b>Non-smoking (%)</b>             | 104<br>(61.9%)      | 14<br>(36.8%)       | 31<br>(64.6%)       | 59 (72.0%)          | 0.003 $KW$      | 0.008 | Cortical-Limbic<br>Cortical-Brainstem  |
| <b>Prodromal NMS</b>               |                     |                     |                     |                     |                 |       |                                        |
| <b>RBD (%)</b>                     | 49<br>(29.2%)       | 14<br>(36.8%)       | 9<br>(18.8%)        | 26 (31.7%)          | 0.145 $\chi^2$  | 0.199 |                                        |
| <b>Smell disorder (%)</b>          | 46<br>(27.4%)       | 14<br>(36.8%)       | 6<br>(12.5%)        | 26 (31.7%)          | 0.020 $\chi^2$  | 0.039 | Limbic-Y/N                             |
| <b>Constipation (%)</b>            | 51<br>(30.4%)       | 8<br>(21.1%)        | 9<br>(18.8%)        | 34 (41.5%)          | 0.009 $\chi^2$  | 0.019 | Brainstem-Y/N                          |
| <b>EDS (%)</b>                     | 15<br>(8.9%)        | 3 (7.9%)            | 2 (4.2%)            | 10 (12.2%)          | 0.292 $\chi^2$  | 0.349 |                                        |
| <b>Hypotension (%)</b>             | 23<br>(13.7%)       | 9<br>(23.7%)        | 4 (8.3%)            | 10 (12.2%)          | 0.104 $\chi^2$  | 0.163 |                                        |
| <b>Sexual dysfunction (%)</b>      | 29<br>(17.3%)       | 5<br>(13.2%)        | 11<br>(22.9%)       | 13 (15.9%)          | 0.441 $\chi^2$  | 0.505 |                                        |
| <b>Micturition dysfunction (%)</b> | 17<br>(10.1%)       | 2 (5.3%)            | 5<br>(10.4%)        | 10 (12.2%)          | 0.502 $\chi^2$  | 0.552 |                                        |
| <b>Depression (%)</b>              | 39<br>(23.2%)       | 3 (7.9%)            | 24<br>(50%)         | 12 (14.6%)          | <0.001 $\chi^2$ | 0.011 | All pairs                              |
| <b>No. of prodromes</b>            | 2.2 $\pm$ 1.34      | 2.16 $\pm$ 1.26     | 2.17 $\pm$ 1.04     | 2.24 $\pm$ 1.53     | 0.947 $KW$      | 0.947 |                                        |
| <b>No. of NMS</b>                  | 6.88 $\pm$ 3.21     | 5.89 $\pm$ 2.15     | 7.25 $\pm$ 2.99     | 7.12 $\pm$ 3.66     | 0.154 $KW$      | 0.207 |                                        |
| <b>MoCA</b>                        | 25.77 $\pm$ 2.55    | 23.97 $\pm$ 1.94    | 26.50 $\pm$ 2.54    | 26.18 $\pm$ 2.43    | <0.001 $KW$     | 0.005 | Cortical-Limbic<br>Cortical-Brainstem  |
| <b>HAM-A</b>                       | 6.05 $\pm$ 5.32     | 2.58 $\pm$ 1.73     | 10.90 $\pm$ 5.07    | 4.83 $\pm$ 4.57     | <0.001 $KW$     | 0.005 | All pairs                              |
| <b>HAM-D</b>                       | 6.95 $\pm$ 5.61     | 3.11 $\pm$ 1.69     | 12.54 $\pm$ 5.50    | 5.46 $\pm$ 4.28     | <0.001 $KW$     | 0.004 | All pairs                              |
| <b>UPDRS III</b>                   | 37.37 $\pm$ 10.96   | 35.76 $\pm$ 9.11    | 39.85 $\pm$ 10.51   | 36.66 $\pm$ 11.85   | 0.130 $KW$      | 0.183 |                                        |
| <b>H&amp;Y</b>                     | 2.45 $\pm$ 0.70     | 2.82 $\pm$ 0.51     | 2.33 $\pm$ 0.75     | 2.35 $\pm$ 0.69     | <0.001 $KW$     | 0.004 | Cortical-Limbic<br>Cortical-Brainstem  |
| <b>LED</b>                         | 725.00 $\pm$ 285.76 | 733.68 $\pm$ 283.27 | 685.62 $\pm$ 276.14 | 744.02 $\pm$ 293.50 | 0.522 $KW$      | 0.563 |                                        |
| <b>ESS</b>                         | 6.72 $\pm$ 4.24     | 6.79 $\pm$ 4.69     | 5.10 $\pm$ 2.68     | 7.63 $\pm$ 4.53     | 0.002 $KW$      | 0.006 | Limbic-Brainstem                       |
| <b>FSS</b>                         | 31.81 $\pm$ 13.18   | 29.76 $\pm$ 10.74   | 35.67 $\pm$ 11.65   | 30.50 $\pm$ 14.64   | 0.023 $KW$      | 0.044 | Cortical-Limbic                        |
| <b>RBDSQ</b>                       | 4.92 $\pm$ 2.65     | 4.39 $\pm$ 2.52     | 4.23 $\pm$ 2.15     | 5.57 $\pm$ 2.83     | 0.008 $KW$      | 0.018 | Limbic-Brainstem                       |

|      |                  |                  |                  |                  |                     |       |                                               |
|------|------------------|------------------|------------------|------------------|---------------------|-------|-----------------------------------------------|
| SAS  | 11.35 ±<br>6.39  | 14.63 ±<br>5.75  | 10.35 ±<br>5.29  | 10.40 ±<br>6.81  | 0.001 <sup>KW</sup> | 0.003 | Cortical-<br>Limbic<br>Cortical-<br>Brainstem |
| NMSS | 59.38 ±<br>36.94 | 48.92 ±<br>21.43 | 66.58 ±<br>34.87 | 60.00 ±<br>42.61 | 0.077 <sup>KW</sup> | 0.128 |                                               |

**Table S2. Frequencies of individual NMS in the overall study population and individual NMS subtype (a priori approach)**

| NMS                            | Overall<br>(n=<br>168)<br>(100%) | Cortical<br>(n= 38)<br>(22.6%) | Limbic<br>(n=48)<br>(20.6%) | Brainstem<br>(n=82)<br>(48.8%) | P-<br>value* | Adj. P-<br>value<br>(Benjamini-<br>Hochberg) | Post hoc<br>test<br>(significant<br>pairs) |
|--------------------------------|----------------------------------|--------------------------------|-----------------------------|--------------------------------|--------------|----------------------------------------------|--------------------------------------------|
| Salivation (%)                 | 38<br>(22.6%)                    | 7<br>(18.4%)                   | 9<br>(18.8%)                | 22 (26.8%)                     | 0.444        | 0.498                                        |                                            |
| Smell disorder<br>(%)          | 54<br>(32.1%)                    | 16<br>(42.1%)                  | 7<br>(14.6%)                | 31 (37.8%)                     | 0.008        | 0.018                                        | Limbic                                     |
| Dysphagia (%)                  | 36<br>(21.4%)                    | 9<br>(23.7%)                   | 8<br>(16.7%)                | 19 (23.2%)                     | 0.635        | 0.647                                        |                                            |
| Nausea/vomiting<br>(%)         | 40<br>(23.8%)                    | 4<br>(10.5%)                   | 10<br>(20.8%)               | 26 (31.7%)                     | 0.034        | 0.060                                        |                                            |
| Constipation (%)               | 75<br>(44.6%)                    | 10<br>(26.3%)                  | 17<br>(35.4%)               | 48 (58.5%)                     | <0.001       | 0.009                                        | Cortical,<br>Brainstem                     |
| Micturition<br>dysfunction (%) | 81<br>(48.2%)                    | 12<br>(31.6%)                  | 19<br>(39.6%)               | 50 (61.0%)                     | 0.004        | 0.010                                        | Brainstem                                  |
| Sexual<br>dysfunction (%)      | 97<br>(57.7%)                    | 19<br>(50.0%)                  | 28<br>(58.3%)               | 50 (61.0%)                     | 0.524        | 0.554                                        |                                            |
| Dizziness (%)                  | 94<br>(56.0%)                    | 20<br>(52.6%)                  | 31<br>(64.6%)               | 43 (52.4%)                     | 0.362        | 0.424                                        |                                            |
| Sleep<br>dysfunction (%)       | 121<br>(72.0%)                   | 24<br>(63.2%)                  | 32<br>(66.7%)               | 65 (79.3%)                     | 0.116        | 0.168                                        |                                            |
| Legs swelling<br>(%)           | 40<br>(23.8%)                    | 7<br>(18.4%)                   | 16<br>(33.3%)               | 17 (20.7%)                     | 0.179        | 0.234                                        |                                            |
| Excessive<br>sweating (%)      | 48<br>(28.6%)                    | 4<br>(10.5%)                   | 12<br>(25.0%)               | 32 (39.0%)                     | 0.005        | 0.012                                        | Cortical,<br>Brainstem                     |
| Diplopia (%)                   | 21<br>(12.5%)                    | 3 (7.9%)                       | 2<br>(4.2%)                 | 16 (19.5%)                     | 0.024        | 0.044                                        | Brainstem                                  |
| Pain (%)                       | 86<br>(51.2%)                    | 15<br>(39.5%)                  | 35<br>(72.9%)               | 36 (43.9%)                     | 0.002        | 0.006                                        | Limbic                                     |
| Depression (%)                 | 91<br>(54.2%)                    | 14<br>(36.8%)                  | 40<br>(83.3%)               | 37 (45.1%)                     | <0.001       | 0.008                                        | Cortical,<br>Limbic                        |
| Anxiety (%)                    | 78<br>(46.4%)                    | 7<br>(18.4%)                   | 43<br>(89.6%)               | 28 (34.1%)                     | <0.001       | 0.007                                        | Cortical,<br>Limbic,<br>Brainstem          |
| Psychosis (%)                  | 27<br>(16.1%)                    | 2 (5.3%)                       | 10<br>(20.8%)               | 15 (18.3%)                     | 0.111        | 0.165                                        |                                            |
| Cognitive<br>impairment (%)    | 102<br>(60.7%)                   | 34<br>(89.5%)                  | 26<br>(54.2%)               | 42 (51.2%)                     | <0.001       | 0.006                                        | Cortical,<br>Brainstem                     |

|                   |               |               |               |            |        |       |          |
|-------------------|---------------|---------------|---------------|------------|--------|-------|----------|
| <b>Apathy (%)</b> | 53<br>(31.5%) | 22<br>(57.9%) | 11<br>(22.9%) | 20 (24.4%) | <0.001 | 0.006 | Cortical |
|-------------------|---------------|---------------|---------------|------------|--------|-------|----------|

\*All hypotheses tested using  $\chi^2$  test of independence.

**Table S3. Frequencies of individual first NMS in the overall study population and individual NMS subtype (a priori approach)**

| <b>First NMS</b>                   | <b>Overall (n= 168)<br/>(100%)</b> | <b>Cortical (n= 38)<br/>(22.6%)</b> | <b>Limbic (n=48)<br/>(20.6%)</b> | <b>Brainstem (n=82)<br/>(48.8%)</b> |
|------------------------------------|------------------------------------|-------------------------------------|----------------------------------|-------------------------------------|
| <b>Smell disorder (%)</b>          | 32 (19.0%)                         | 12 (31.6%)                          | 3 (6.3%)                         | 17 (20.7%)                          |
| <b>Constipation (%)</b>            | 33 (19.6%)                         | 6 (15.8%)                           | 5 (10.4%)                        | 22 (26.8%)                          |
| <b>Micturition dysfunction (%)</b> | 2 (1.2%)                           | 0                                   | 1 (2.1%)                         | 1 (1.2%)                            |
| <b>Sexual dysfunction (%)</b>      | 8 (4.8%)                           | 2 (5.3%)                            | 2 (4.2%)                         | 4 (4.9%)                            |
| <b>Dizziness (%)</b>               | 9 (5.4%)                           | 2 (5.3%)                            | 4 (8.3%)                         | 3 (3.7%)                            |
| <b>Sleep dysfunction (%)</b>       | 27 (16.1%)                         | 8 (21.1%)                           | 4 (8.3%)                         | 15 (18.3%)                          |
| <b>Legs swelling (%)</b>           | 1 (0.6%)                           | 0                                   | 0                                | 1 (1.2%)                            |
| <b>Excessive sweating (%)</b>      | 10 (6.0%)                          | 1 (2.6%)                            | 2 (4.2%)                         | 7 (8.5%)                            |
| <b>Pain (%)</b>                    | 9 (5.4%)                           | 2 (5.3%)                            | 3 (6.3%)                         | 4 (4.9%)                            |
| <b>Depression (%)</b>              | 19 (11.3%)                         | 0                                   | 14 (29.2%)                       | 5 (6.1%)                            |
| <b>Anxiety (%)</b>                 | 13 (7.7%)                          | 1 (2.6%)                            | 10 (20.8%)                       | 2 (2.4%)                            |
| <b>Cognitive impairment (%)</b>    | 4 (2.4%)                           | 4 (10.5%)                           | 0                                | 0                                   |

**Table S4. Demographic and clinical characteristics of the overall study population based on cluster analysis**

|                                     | <b>Overall<br/>(n= 168)<br/>(100%)</b> | <b>Cluster<br/>1 (n=31)<br/>(18.5%)</b> | <b>Cluster<br/>2 (n=33)<br/>(19.6%)</b> | <b>Cluster<br/>3 (n=34)<br/>(20.2%)</b> | <b>Cluster<br/>4 (n=52)<br/>(31.0%)</b> | <b>Cluster<br/>5 (n=18)<br/>(10.7%)</b> | <b>P-value</b> | <b>Adj. P-value<br/>(Benjamini-Hochberg)</b> |
|-------------------------------------|----------------------------------------|-----------------------------------------|-----------------------------------------|-----------------------------------------|-----------------------------------------|-----------------------------------------|----------------|----------------------------------------------|
| <b>Gender (male) (%)</b>            | 100<br>(59.9%)                         | 21<br>(67.7%)                           | 11<br>(33.3%)                           | 21<br>(61.8%)                           | 34<br>(65.3%)                           | 13<br>(72.2%)                           | 0.015 $\chi^2$ | 0.025                                        |
| <b>Age (years)</b>                  | 71.70 $\pm$<br>9.57                    | 78.29 $\pm$<br>8.60                     | 69.33 $\pm$<br>8.67                     | 71.85 $\pm$<br>10.29                    | 68.58 $\pm$<br>8.87                     | 73.39 $\pm$<br>7.94                     | <0.001<br>KW   | 0.038                                        |
| <b>Age at onset (years)</b>         | 65.45 $\pm$<br>10.18                   | 72.74 $\pm$<br>8.71                     | 62.42 $\pm$<br>9.09                     | 64.91 $\pm$<br>10.05                    | 64.10 $\pm$<br>9.77                     | 63.39 $\pm$<br>11.03                    | <0.001<br>KW   | 0.019                                        |
| <b>Age at onset 50-70 years (%)</b> | 103<br>(61.3%)                         | 8<br>(25.8%)                            | 24<br>(72.7%)                           | 24<br>(70.6%)                           | 37<br>(71.2%)                           | 10<br>(55.6%)                           | <0.001<br>KW   | 0.013                                        |

|                                         |                |               |               |               |               |               |                      |       |
|-----------------------------------------|----------------|---------------|---------------|---------------|---------------|---------------|----------------------|-------|
| Education ≥ 3. stage based on ISCED (%) | 123<br>(73.2%) | 14<br>(45.2%) | 28<br>(84.8%) | 26<br>(76.5%) | 42<br>(80.8%) | 13<br>(72.2%) | 0.004 <sup>KW</sup>  | 0.008 |
| Right-handed (%)                        | 144<br>(85.7%) | 20<br>(64.5%) | 31<br>(93.9%) | 31<br>(91.2%) | 34<br>(65.4%) | 17<br>(94.4%) | 0.002 <sup>χ²</sup>  | 0.004 |
| Disease duration > 10 years (%)         | 34<br>(20.2%)  | 4<br>(12.9%)  | 7<br>(21.2%)  | 10<br>(29.4%) | 5 (9.6%)      | 8<br>(44.4%)  | 0.003 <sup>KW</sup>  | 0.006 |
| + family history                        | 27<br>(16.1%)  | 9<br>(29.0%)  | 4<br>(12.1%)  | 6<br>(17.6%)  | 6<br>(11.5%)  | 2<br>(11.1%)  | 0.449 <sup>χ²</sup>  | 0.461 |
| Side of onset – right (%)               | 92<br>(54.8%)  | 20<br>(64.5%) | 18<br>(54.5%) | 18<br>(52.9%) | 29<br>(55.8%) | 7<br>(38.9%)  | 0.543 <sup>χ²</sup>  | 0.543 |
| Motor subtype:                          |                |               |               |               |               |               |                      |       |
| TD (%)                                  | 87<br>(51.8%)  | 2 (6.5%)      | 28<br>(84.8%) | 19<br>(55.9%) | 29<br>(55.8%) | 9<br>(50.0%)  | <0.001 <sup>χ²</sup> | 0.003 |
| PIGD (%)                                | 61<br>(36.3%)  | 28<br>(90.3%) | 5<br>(15.2%)  | 9<br>(26.5%)  | 12<br>(23.1%) | 7<br>(38.9%)  |                      |       |
| Intermediate (%)                        | 20<br>(11.9%)  | 1 (3.2%)      | 0 (0.0%)      | 6<br>(17.6%)  | 11<br>(21.2%) | 2<br>(11.1%)  |                      |       |
| Risk factors                            |                |               |               |               |               |               |                      |       |
| Pesticides (%)                          | 53<br>(31.5%)  | 9<br>(29.0%)  | 7<br>(21.2%)  | 13<br>(38.2%) | 14<br>(26.9%) | 10<br>(55.6%) | 0.101 <sup>χ²</sup>  | 0.132 |
| Solvents (%)                            | 28<br>(16.7%)  | 5<br>(16.1%)  | 1 (3.0%)      | 4<br>(11.8%)  | 13<br>(25.0%) | 5<br>(27.8%)  | 0.056 <sup>χ²</sup>  | 0.082 |
| Rural environment (%)                   | 111<br>(66.1%) | 15<br>(48.4%) | 21<br>(63.6%) | 24<br>(70.6%) | 37<br>(71.2%) | 14<br>(77.8%) | 0.170 <sup>χ²</sup>  | 0.202 |
| Head injury (%)                         | 26<br>(15.5%)  | 10<br>(32.3%) | 2 (6.1%)      | 4<br>(11.8%)  | 3 (5.8%)      | 7<br>(38.9%)  | <0.001 <sup>χ²</sup> | 0.010 |
| Non-caffeine (%)                        | 56<br>(33.3%)  | 15<br>(48.4%) | 29<br>(87.9%) | 20<br>(58.8%) | 36<br>(69.2%) | 12<br>(66.7%) | 0.014 <sup>χ²</sup>  | 0.024 |
| Alcohol (%)                             | 53<br>(31.5%)  | 6<br>(19.4%)  | 8<br>(24.2%)  | 19<br>(55.9%) | 13<br>(25.0%) | 7<br>(38.9%)  | 0.019 <sup>χ²</sup>  | 0.030 |
| Non-smoking (%)                         | 104<br>(61.9%) | 13<br>(41.9%) | 20<br>(60.6%) | 24<br>(70.6%) | 36<br>(69.2%) | 11<br>(61.1%) | 0.286 <sup>χ²</sup>  | 0.320 |
| Prodromal NMS                           |                |               |               |               |               |               |                      |       |
| RBD (%)                                 | 49<br>(29.2%)  | 11<br>(35.5%) | 7<br>(21.2%)  | 9<br>(26.5%)  | 14<br>(26.9%) | 8<br>(44.4%)  | 0.421 <sup>χ²</sup>  | 0.444 |
| Smell disorder (%)                      | 46<br>(27.4%)  | 14<br>(45.2%) | 4<br>(12.1%)  | 10<br>(29.4%) | 12<br>(23.1%) | 6<br>(33.3%)  | 0.046 <sup>χ²</sup>  | 0.070 |
| Constipation (%)                        | 51<br>(30.4%)  | 5<br>(16.1%)  | 5<br>(15.2%)  | 20<br>(58.8%) | 12<br>(23.1%) | 9<br>(50.0%)  | <0.001 <sup>χ²</sup> | 0.008 |
| EDS (%)                                 | 15<br>(8.9%)   | 3 (9.7%)      | 0 (0.0%)      | 6<br>(17.6%)  | 5 (9.6%)      | 1 (5.6%)      | 0.152 <sup>χ²</sup>  | 0.186 |

|                                    |                     |                     |                     |                     |                     |                     |                 |              |
|------------------------------------|---------------------|---------------------|---------------------|---------------------|---------------------|---------------------|-----------------|--------------|
| <b>Hypotension (%)</b>             | 23<br>(13.7%)       | 9<br>(29.0%)        | 4<br>(12.1%)        | 3 (8.8%)            | 6<br>(11.5%)        | 1 (5.6%)            | 0.087 $\chi^2$  | 0.118        |
| <b>Sexual dysfunction (%)</b>      | 29<br>(17.3%)       | 6<br>(19.4%)        | 6<br>(18.2%)        | 6<br>(17.6%)        | 5 (9.6%)            | 6<br>(33.3%)        | 0.240 $\chi^2$  | 0.276        |
| <b>Micturition dysfunction (%)</b> | 17<br>(10.1%)       | 2 (6.5%)            | 1 (3.0%)            | 3 (8.8%)            | 8<br>(15.4%)        | 3<br>(16.7%)        | 0.311 $\chi^2$  | 0.338        |
| <b>Depression (%)</b>              | 39<br>(23.2%)       | 2 (6.5%)            | 17<br>(51.5%)       | 5<br>(14.7%)        | 9<br>(17.3%)        | 6<br>(33.3%)        | <0.001 $\chi^2$ | 0.006        |
| <b>No. of prodromes</b>            | 2.2 $\pm$ 1.34      | 2.42 $\pm$ 1.23     | 2.06 $\pm$ 0.97     | 2.41 $\pm$ 1.74     | 1.85 $\pm$ 1.18     | 2.72 $\pm$ 1.49     | 0.106 $KW$      | 0.134        |
| <b>No. of NMS</b>                  | 6.88 $\pm$ 3.21     | 6.58 $\pm$ 1.65     | 7.58 $\pm$ 2.54     | 8.03 $\pm$ 2.67     | 4.35 $\pm$ 2.66     | 11.28 $\pm$ 2.35    | <0.001 $KW$     | 0.005 (sig.) |
| <b>MoCA</b>                        | 25.77 $\pm$ 2.55    | 23.45 $\pm$ 1.75    | 26.55 $\pm$ 2.21    | 25.94 $\pm$ 2.41    | 27.10 $\pm$ 2.12    | 24.22 $\pm$ 2.32    | <0.001 $KW$     | 0.004        |
| <b>HAM-A</b>                       | 6.05 $\pm$ 5.32     | 2.87 $\pm$ 2.13     | 12.33 $\pm$ 4.76    | 4.15 $\pm$ 2.23     | 3.02 $\pm$ 2.43     | 12.39 $\pm$ 5.17    | <0.001 $KW$     | 0.004        |
| <b>HAM-D</b>                       | 6.95 $\pm$ 5.61     | 3.06 $\pm$ 1.18     | 14.27 $\pm$ 4.89    | 4.88 $\pm$ 2.27     | 3.83 $\pm$ 1.92     | 163.17 $\pm$ 5.44   | <0.001 $KW$     | 0.003        |
| <b>UPDRS III</b>                   | 37.37 $\pm$ 10.96   | 36.29 $\pm$ 7.26    | 39.21 $\pm$ 6.80    | 38.85 $\pm$ 9.56    | 32.63 $\pm$ 11.93   | 46.72 $\pm$ 14.90   | <0.001 $KW$     | 0.003        |
| <b>H&amp;Y</b>                     | 2.45 $\pm$ 0.70     | 2.90 $\pm$ 0.40     | 2.27 $\pm$ 0.63     | 2.50 $\pm$ 0.66     | 2.04 $\pm$ 0.52     | 3.11 $\pm$ 0.83     | <0.001 $KW$     | 0.003        |
| <b>LED</b>                         | 725.00 $\pm$ 285.76 | 748.39 $\pm$ 296.56 | 673.18 $\pm$ 270.57 | 751.47 $\pm$ 234.74 | 682.88 $\pm$ 308.40 | 851.39 $\pm$ 294.87 | 0.077 $KW$      | 0.108        |
| <b>ESS</b>                         | 6.72 $\pm$ 4.24     | 7.13 $\pm$ 4.77     | 5.18 $\pm$ 2.69     | 8.29 $\pm$ 5.24     | 5.52 $\pm$ 3.19     | 9.33 $\pm$ 4.23     | <0.001 $KW$     | 0.003        |
| <b>FSS</b>                         | 31.81 $\pm$ 13.18   | 31.42 $\pm$ 9.91    | 35.12 $\pm$ 10.68   | 34.56 $\pm$ 14.14   | 24.77 $\pm$ 12.77   | 41.56 $\pm$ 12.35   | <0.001 $KW$     | 0.002        |
| <b>RBDSQ</b>                       | 4.92 $\pm$ 2.65     | 4.90 $\pm$ 2.71     | 4.48 $\pm$ 2.32     | 5.85 $\pm$ 2.80     | 4.10 $\pm$ 2.07     | 6.39 $\pm$ 3.33     | 0.010 $KW$      | 0.018        |
| <b>SAS</b>                         | 11.35 $\pm$ 6.39    | 15.71 $\pm$ 5.62    | 10.85 $\pm$ 5.69    | 11.24 $\pm$ 5.56    | 7.77 $\pm$ 5.07     | 15.28 $\pm$ 7.51    | <0.001 $KW$     | 0.002        |
| <b>NMSS</b>                        | 59.38 $\pm$ 36.94   | 56.90 $\pm$ 15.91   | 68.27 $\pm$ 21.48   | 64.47 $\pm$ 22.61   | 25.54 $\pm$ 13.04   | 135.44 $\pm$ 27.20  | <0.001 $KW$     | 0.005        |
